# Supplementary material for: Real-world experience with the cusp-overlap deployment technique in transcatheter aortic valve replacement: A propensity-matched analysis
Source: PubMed Central journal article supplement (PMC9471948; doi:10.3389/fcvm.2022.847568), 2022-08-31
Supplement: Table_1.pdf [file Table_1.pdf]

## *Supplementary Material*

### 1 Supplementary Data

**Supplementary Table 1. Procedural characteristics in unmatched cohorts.**

|                                       |       | <b>Total<br/>(n=759)</b> | <b>COT<br/>(n=170)</b> | <b>Non-COT<br/>(n=589)</b> | <b>p-value</b>    |
|---------------------------------------|-------|--------------------------|------------------------|----------------------------|-------------------|
| Prosthesis size                       | 23 mm | 9 (1.2)                  | 2 (1.2)                | 7 (1.2)                    | 0.990             |
|                                       | 26 mm | 206 (27.1)               | 42 (24.7)              | 164 (27.8)                 | 0.418             |
|                                       | 29 mm | 359 (47.3)               | 79 (46.5)              | 280 (47.5)                 | 0.806             |
|                                       | 34 mm | 184 (24.2)               | 46 (27.1)              | 138 (23.4)                 | 0.331             |
| Contrast agent, ml                    |       | 89.6 ± 42.6              | 80.7 ± 33.0            | 92.1 ± 42.8                | <b>*0.001</b>     |
| Fluoroscopy time, min                 |       | 18.8 ± 9.0               | 18.1 ± 7.4             | 18.3 ± 8.8                 | 0.787             |
| Dose area product, Gy*cm <sup>2</sup> |       | 4039 ± 3486              | 5174 ± 4242            | 3714 ± 3168                | <b>*&lt;0.001</b> |
| Pre-dilatation                        |       | 296 (39.0)               | 72 (42.4)              | 224 (38.0)                 | 0.309             |
| Post-dilatation                       |       | 101 (13.3)               | 27 (15.9)              | 74 (12.6)                  | 0.262             |
| Resheathing                           |       | 269 (35.4)               | 89 (52.4)              | 180 (30.6)                 | <b>*&lt;0.001</b> |
| Mean area oversizing, %               |       | 7.8 ± 7.2                | 7.6 ± 6.4              | 8.0 ± 7.9                  | 0.545             |
| Valve dislocation                     |       | 13 (1.7)                 | 2 (1.2)                | 11 (1.9)                   | 0.541             |
| Need for a second transcatheter valve |       | 6 (0.8)                  | 2 (1.1)                | 4 (0.7)                    | 0.519             |
| Coronary obstruction                  |       | 0 (0.0)                  | 0 (0.0)                | 0 (0.0)                    | 0.999             |
| Conversion to surgery                 |       | 0 (0.0)                  | 0 (0.0)                | 0 (0.0)                    | 0.999             |

Values are mean ± SD or n (%).

**Supplementary Table 2. 30-day procedural outcome in unmatched cohorts.**

|                              | <b>Total<br/>(n=759)</b> | <b>COT<br/>(n=170)</b> | <b>Non-COT<br/>(n=589)</b> | <b>p-value</b>    |
|------------------------------|--------------------------|------------------------|----------------------------|-------------------|
| ID (mean NCC-LCC), mm        | -4.7 ± 2.6               | -3.8 ± 2.5             | -4.9 ± 2.6                 | <b>*&lt;0.001</b> |
| Target ID reached            | 424 (55.9)               | 88 (51.8)              | 336 (57.0)                 | 0.222             |
| Symmetric valve deployment   | 399 (52.6)               | 113 (66.5)             | 286 (48.6)                 | <b>*&lt;0.001</b> |
| 30-day mortality             | 2 (0.3)                  | 0 (0.0)                | 2 (0.3)                    | 0.447             |
| Major bleeding               | 66 (8.7)                 | 15 (8.8)               | 51 (8.7)                   | 0.946             |
| Major vascular complications | 74 (9.7)                 | 22 (12.9)              | 52 (8.8)                   | 0.111             |
| Stroke                       | 25 (3.3)                 | 7 (4.1)                | 18 (3.1)                   | 0.495             |
| AKI I-III                    | 99 (13.0)                | 28 (16.5)              | 71 (12.1)                  | 0.132             |
| New RRT                      | 13 (1.7)                 | 3 (1.8)                | 10 (1.7)                   | 0.953             |
| New PPI                      | 105 (16.0)               | 13 (8.8)               | 92 (18.1)                  | <b>*0.007</b>     |
|                              | (n=657)                  | (n=148)                | (n=509)                    |                   |
| New LBBB                     | 113 (16.2)               | 22 (13.8)              | 91 (16.9)                  | 0.364             |
|                              | (n=699)                  | (n=159)                | (n=540)                    |                   |
| New-onset AF                 | 23 (4.9)                 | 5 (4.2)                | 18 (5.2)                   | 0.664             |
|                              | (n=465)                  | (n=119)                | (n=346)                    |                   |
| dPmean, mmHg                 | 7.1 ± 3.4                | 7.6 ± 3.4              | 7.3 ± 3.4                  | 0.311             |
| dPmax, mmHg                  | 13.2 ± 6.2               | 13.5 ± 6.5             | 13.1 ± 6.2                 | 0.464             |
| PVL >I°                      | 33 (4.3)                 | 8 (4.7)                | 25 (4.2)                   | 0.795             |
| In-hospital stay, days       | 9.7 ± 6.1                | 8.0 ± 4.9              | 10.2 ± 6.4                 | <b>*&lt;0.001</b> |
| ICU stay, days               | 2.0 ± 2.4                | 1.4 ± 1.0              | 2.2 ± 2.6                  | <b>*&lt;0.001</b> |

Values are mean ± SD or n (%).

AF=atrial fibrillation; AKI=acute kidney injury; dPmean/dPmax=mean/maximal transvalvular gradient; ICU=intensive care unit; ID=implantation depth; LBBB=left bundle branch block; LCC=left coronary cusp; NCC=non-coronary cusp; PPI=permanent pacemaker implantation; PVL=paravalvular leakage; RRT=renal replacement therapy.
